# Supplementary material for: Solar production of fuels from CO2 with high efficiency and stability via in situ transformation of Bi electrocatalysts
Source: Royal Society of Chemistry journal article supplement (doi:10.1039/d4ey00209a), 2024-11-19
Supplement: d4ey00209a1.pdf [file d4ey00209a1.pdf]

**-Electronic Supplementary Information-**

**Solar production of fuels from CO<sub>2</sub> with high efficiency and stability via *in situ* transformation of Bi electrocatalyst**

*Woo Seok Cheon<sup>a</sup>, Su Geun Ji<sup>a,b</sup>, Jaehyun Kim<sup>a</sup>, Sungkyun Choi<sup>a</sup>, Jin Wook Yang<sup>a</sup>, Sang Eon Jun<sup>a</sup>, Changyeon Kim<sup>a</sup>, Jeewon Bu<sup>a</sup>, Sohyeon Park<sup>a</sup>, Tae Hyung Lee<sup>a</sup>, Jinghan Wang<sup>a</sup>, Jae Young Kim<sup>a</sup>, Sol A Lee<sup>a,c</sup>, Jin Young Kim<sup>a,\*</sup>, Ho Won Jang<sup>a,d,\*</sup>*

<sup>a</sup> Department of Materials Science and Engineering, Research Institute of Advanced Materials, Seoul National University, Seoul, 08826, Republic of Korea

<sup>b</sup> Chemistry and Nanoscience Center, National Renewable Energy Laboratory, Golden, Colorado 80401, United States

<sup>c</sup> Liquid Sunlight Alliance (LiSA), Department of Applied Physics and Materials Science, California Institute of Technology, Pasadena, CA, 91106 USA

<sup>d</sup> Advanced Institute of Convergence Technology, Seoul National University, Suwon 16229, Republic of Korea

\*Correspondence: [hwjang@snu.ac.kr](mailto:hwjang@snu.ac.kr), [jykim.mse@snu.ac.kr](mailto:jykim.mse@snu.ac.kr)

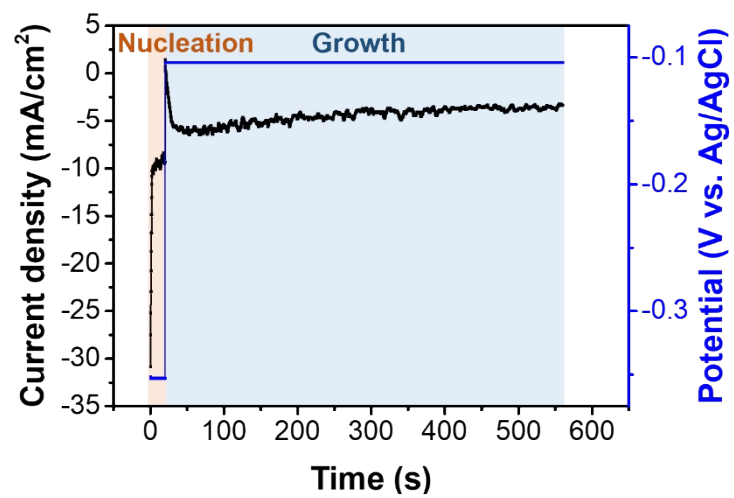

**Figure S1.** Two-step electrodeposition process of BiOI on carbon paper.

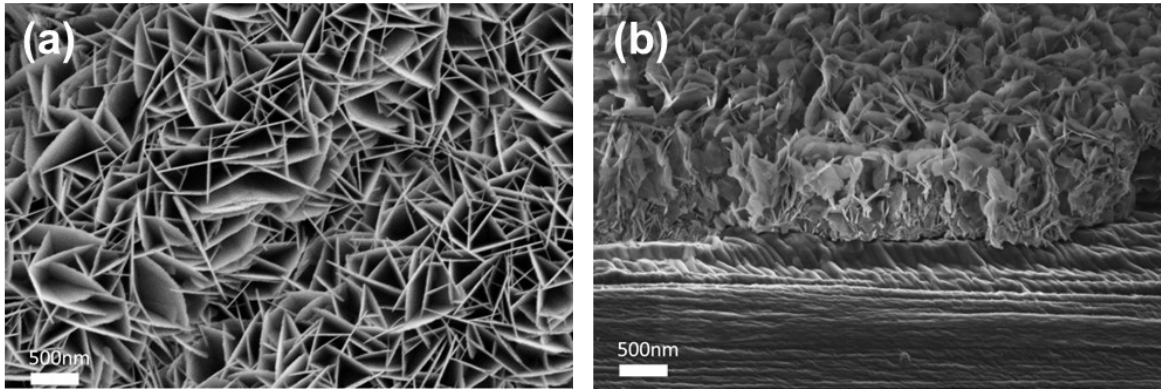

**Figure S2.** BiOI SEM images (a) top-view (b) cross-sectional view.

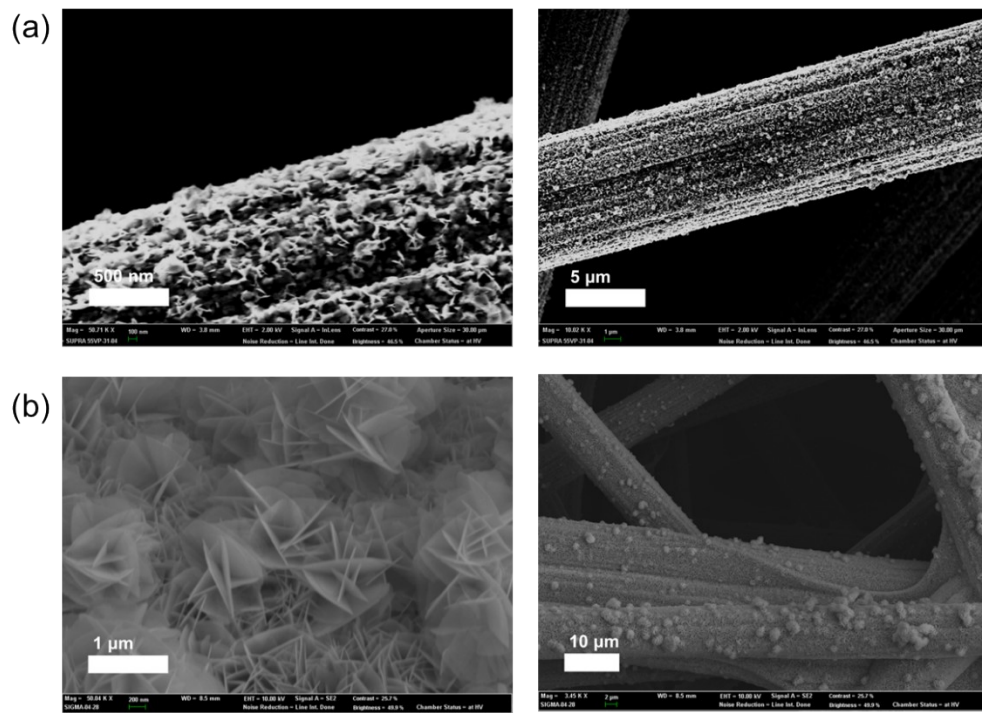

**Figure S3.** SEM images of BiOI with different electrodeposition time (a) 60 s (b) 720 s.

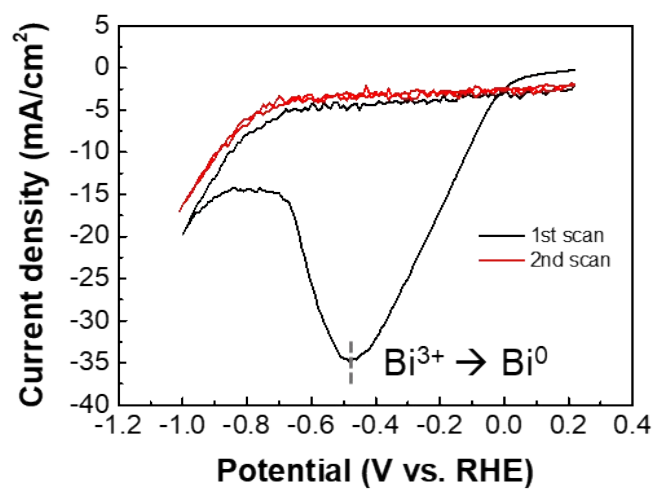

**Figure S4.** CV of BiOI in 0.2 M KHCO<sub>3</sub>.

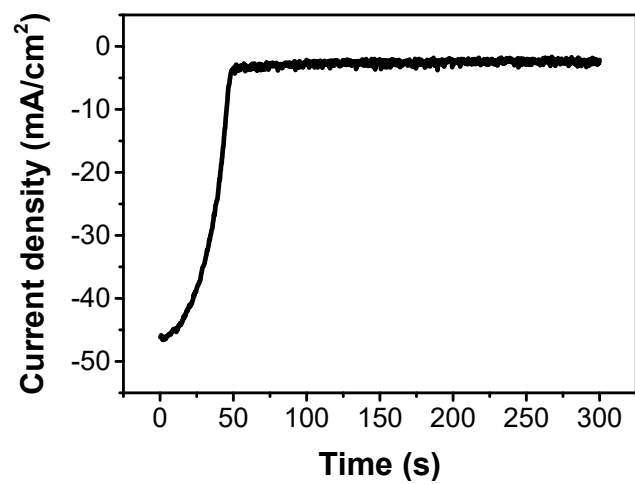

**Figure S5.** Chronoamperometric (CA) reduction of BiOI to Bi-VNS at  $-0.5 V_{RHE}$ .

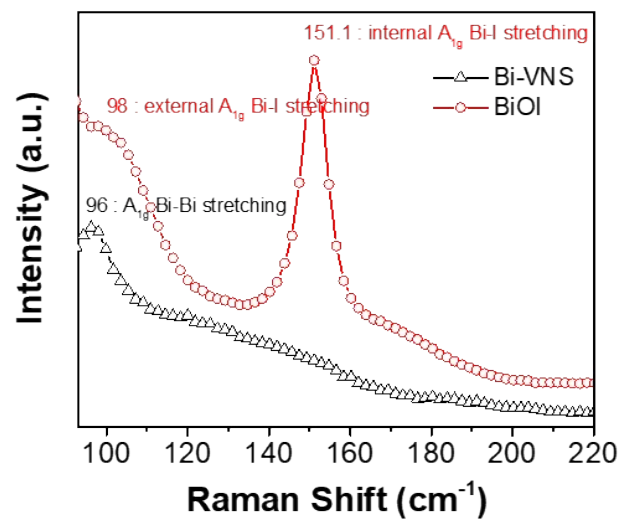

**Figure S6.** Raman spectra of BiOI and Bi-VNS

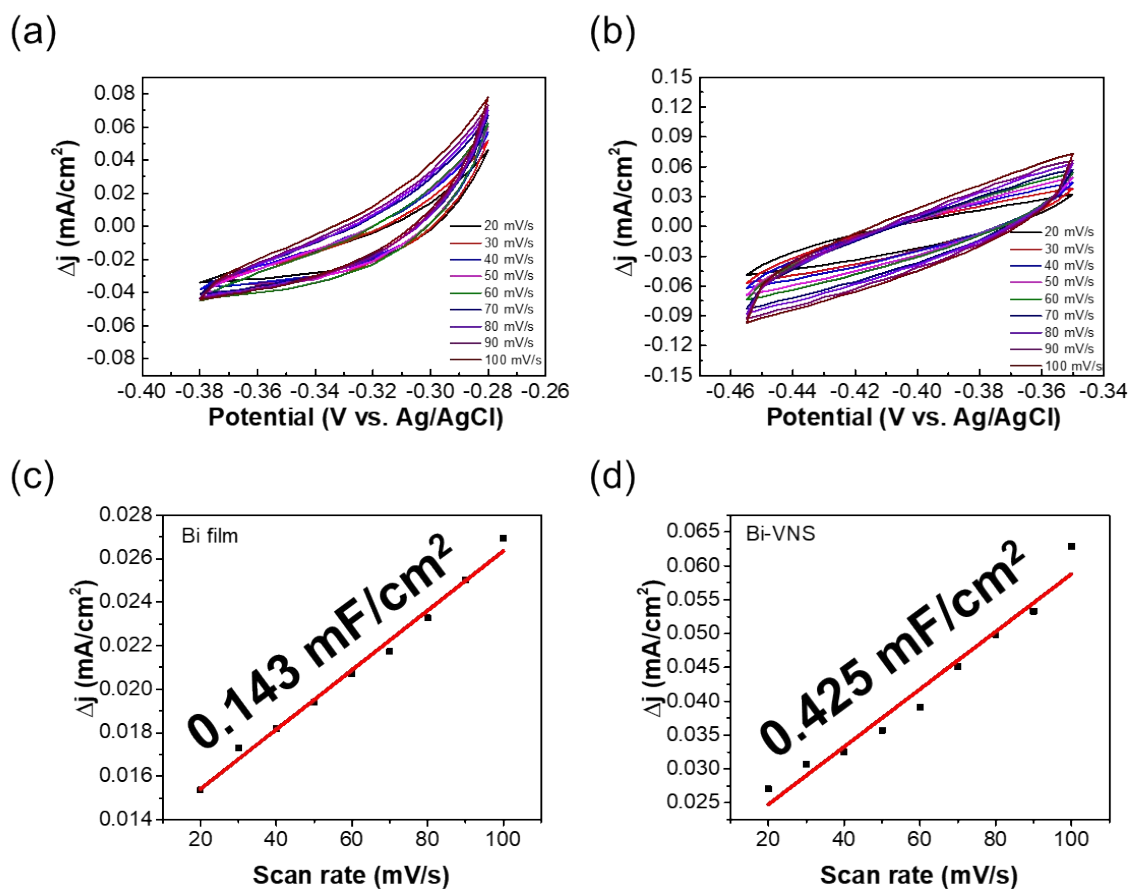

**Figure S7.** CV curves at different scan rates of (a) Bi film and (b) Bi-VNS. Calculated double-layer capacitances ( $C_{DL}$ ) of (c) Bi film (d) Bi-VNS.



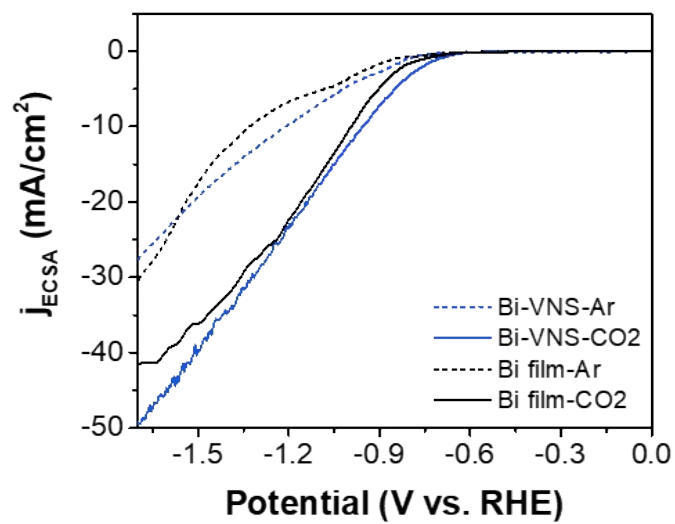

**Figure S8.** ECDSA-normalized LSVs of Bi film and Bi-VNS

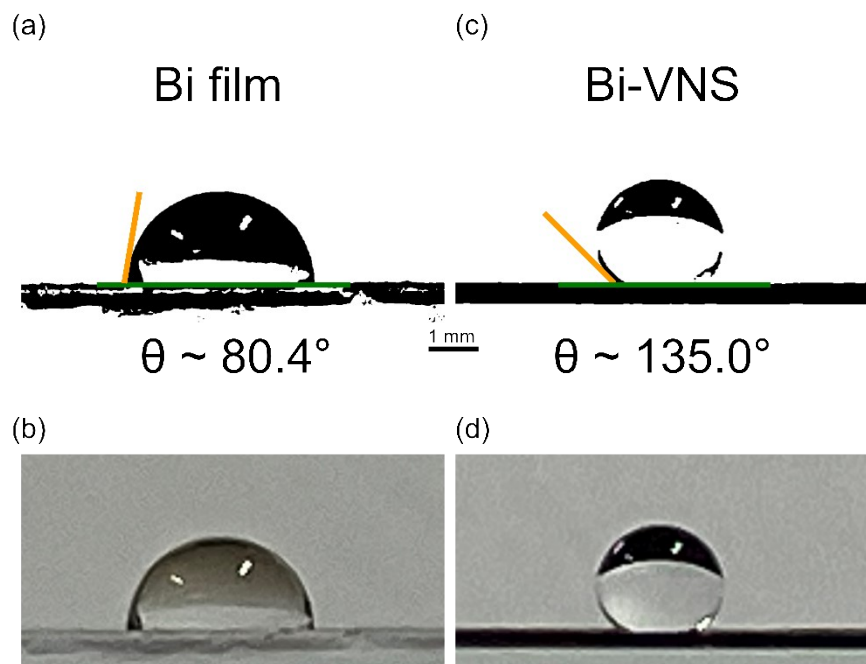

**Figure S9.** Contact angle measurement of water on (a, b) Bi film and (c, d) Bi-VNS

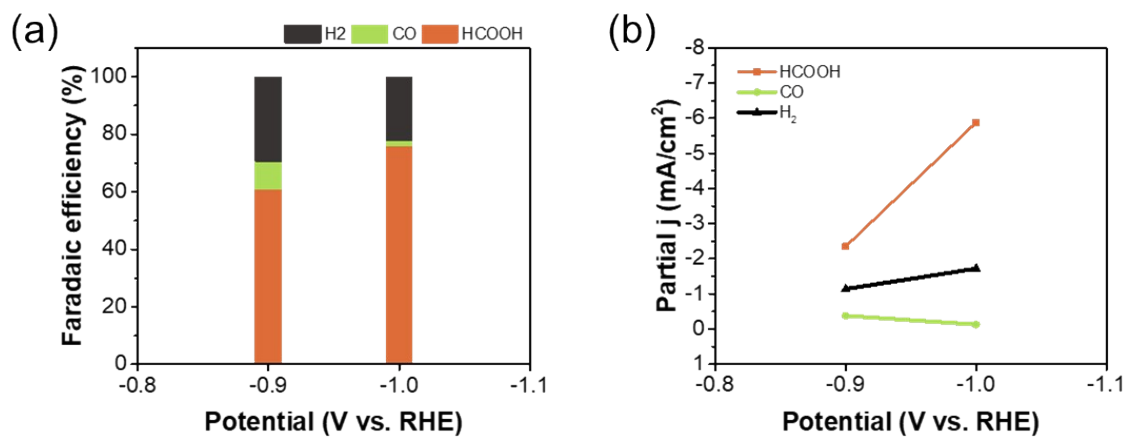

Figure S10. (a) FE and (b)  $j_{\text{HCOOH}}$  of Bi film.

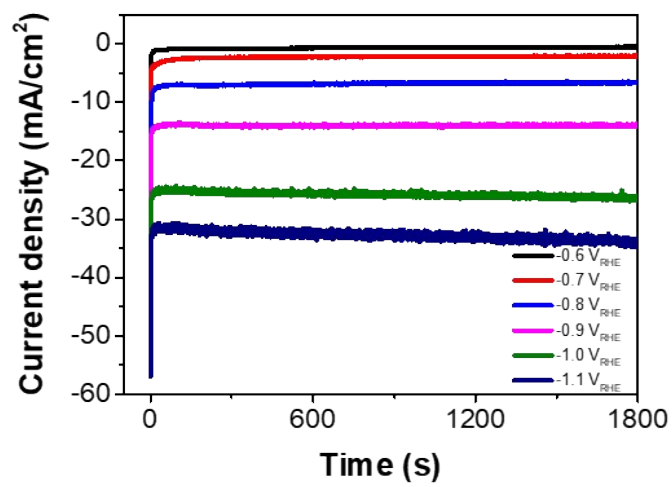

**Figure S11.** CA curves during FE measurements.

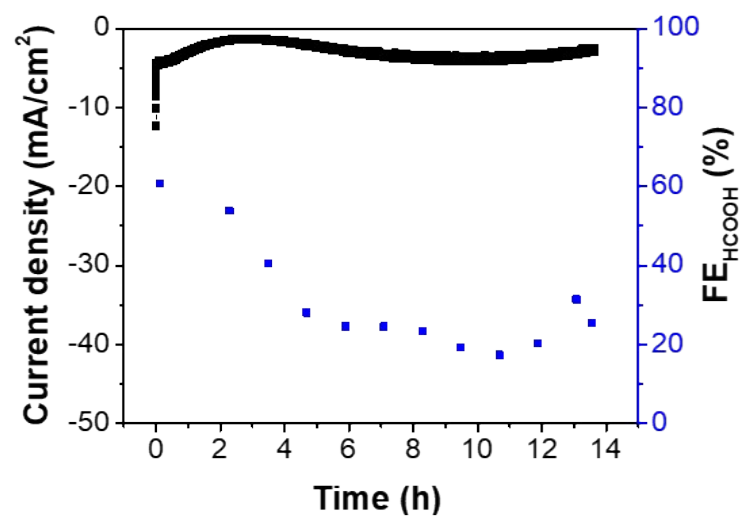

**Figure S12.** FE<sub>HCOOH</sub> and CA curve of Bi film.

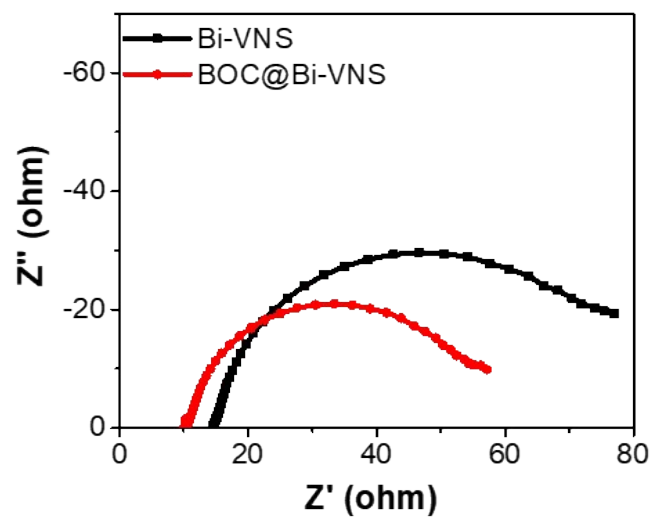

**Figure S13.** Nyquist plots for Bi-VNS and BOC@Bi-VNS.

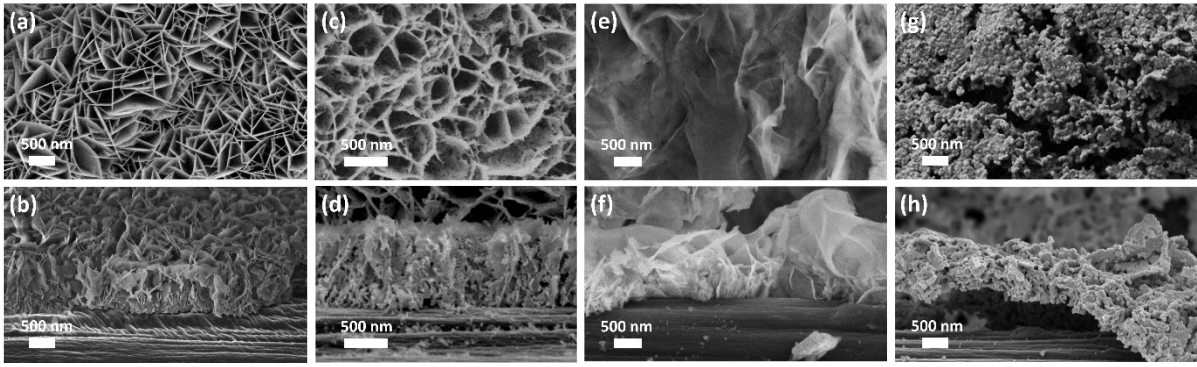

**Figure S14.** Top-view and cross-sectional view SEM images of Bi-based cathodes at each stage. (a,b) BiOI, (c,d) Bi-VNS, (e,f) Bi-VNS after 12 h of electrolysis, (g,h) Bi-VNS after 24 h of electrolysis (BOC@Bi-VNS).

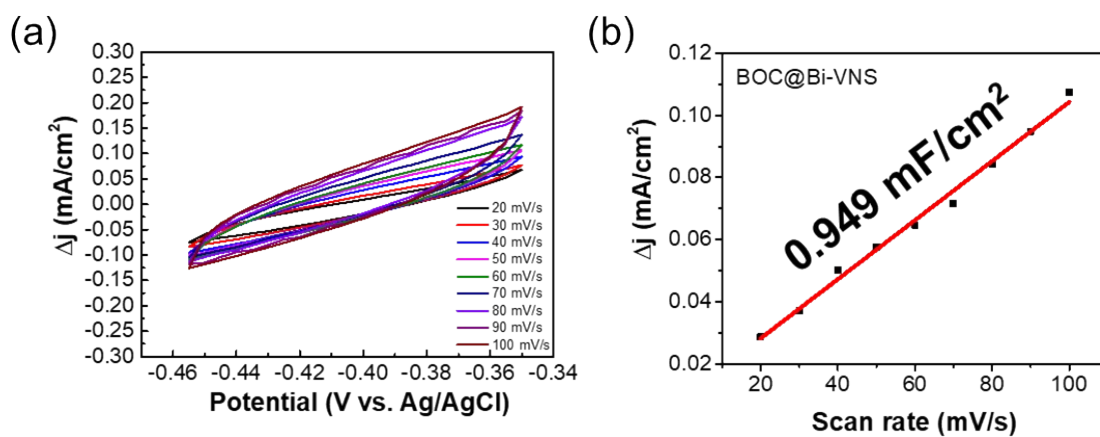

**Figure S15.** (a) CV curves at different scan rates and (b) calculated double-layer capacitances ( $C_{DL}$ ) of BOC@Bi-VNS.



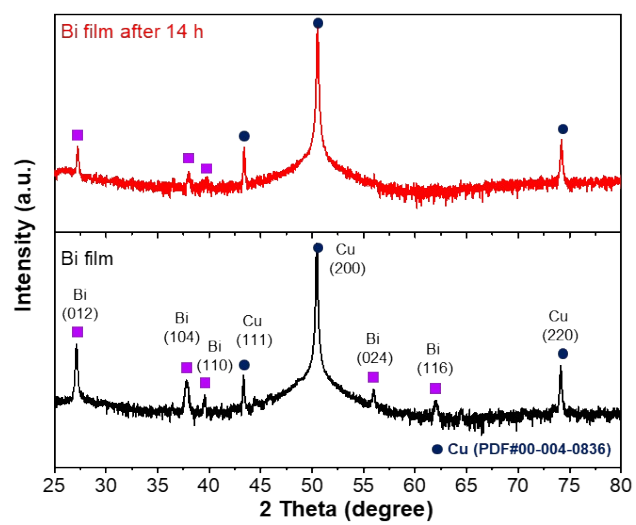

Figure S16. XRD patterns of Bi films.

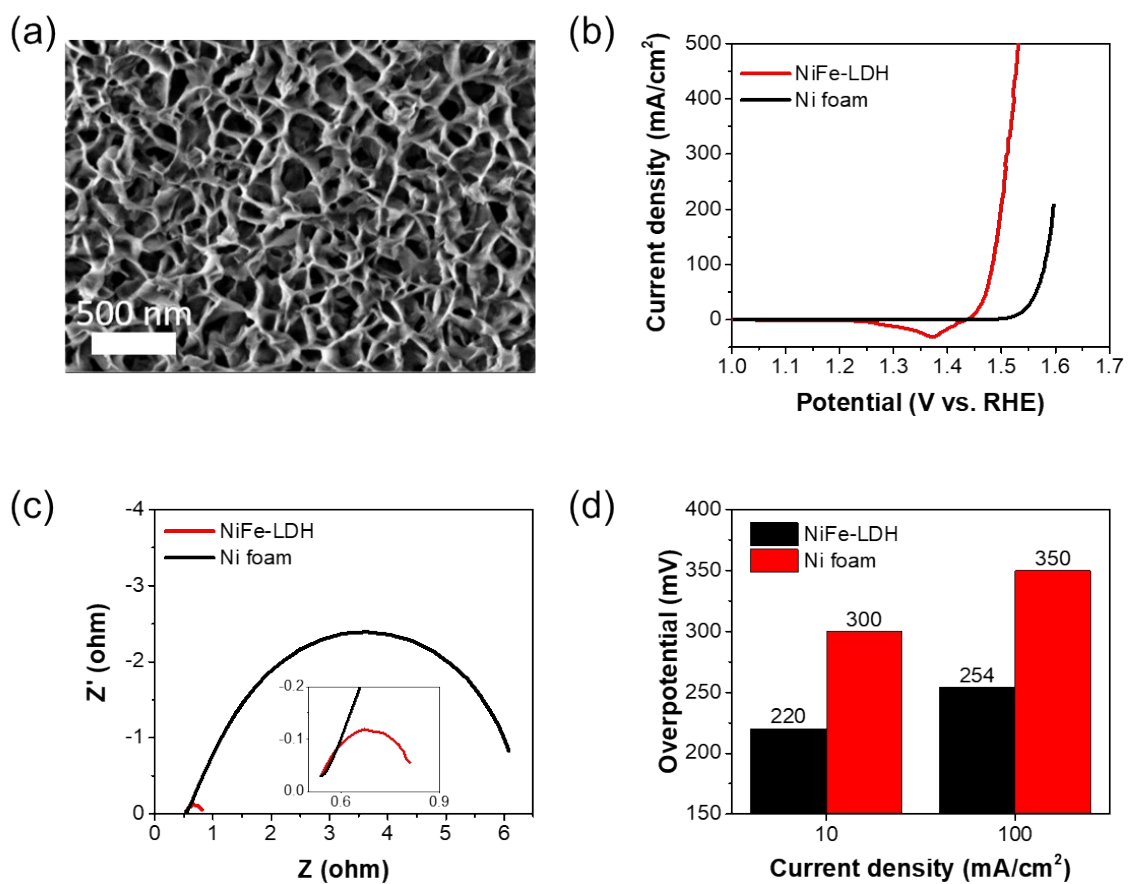

**Figure S17.** (a) SEM image of NiFe-LDH. (b) LSV, (c) Nyquist plots (inset: magnified plots) and (d) overpotentials of NiFe-LDH and Ni foam

Table S1. Faradaic efficiencies and partial current densities for CO<sub>2</sub>RR electrocatalysts in a gas-tight H-cell.

| Materials             | Electrolyte              | FE <sub>HCOOH, MAX</sub> (%) | j <sub>HCOOH</sub> at<br>FE <sub>MAX</sub> (mA cm <sup>-2</sup> ) | Potential<br>(V vs. RHE) | Ref.             |
|-----------------------|--------------------------|------------------------------|-------------------------------------------------------------------|--------------------------|------------------|
| Bi-VNS                | 0.2 M KHCO <sub>3</sub>  | 97.2                         | 32.5                                                              | -1.1                     | <b>This Work</b> |
| BMNS                  | 0.5 M KHCO <sub>3</sub>  | 98                           | 23                                                                | -0.8                     | 1                |
| Cu foam@BiNW          | 0.5 M NaHCO <sub>3</sub> | 95                           | 15                                                                | -0.69                    | 2                |
| Bi nanosheets         | 0.1 M KHCO <sub>3</sub>  | 86                           | 16.5                                                              | -1.1                     | 3                |
| Bi-NRs@NCNT           | 0.1 M KHCO <sub>3</sub>  | 90.9                         | ≈5                                                                | -0.9                     | 4                |
| Bi NR                 | 0.5 M KHCO <sub>3</sub>  | 98.6                         | ≈5                                                                | -0.8                     | 5                |
| Bi@Sn NPs             | 0.5 M KHCO <sub>3</sub>  | 91                           | 31                                                                | -1.1                     | 6                |
| Bi19Br3S27            | 0.1 M KHCO <sub>3</sub>  | 98                           | N/A                                                               | -1.1                     | 7                |
| D-NR                  | 0.5 M KHCO <sub>3</sub>  | 81.3                         | ≈7                                                                | -1                       | 8                |
| Bi-Sn                 | 0.1 M KHCO <sub>3</sub>  | 93.9                         | 9.3                                                               | -1                       | 9                |
| MHKTs                 | 0.5 M KHCO <sub>3</sub>  | 95                           | < 1                                                               | -1                       | 10               |
| NiSn-APC<br>nanoarray | 0.5 M KHCO <sub>3</sub>  | 86.1                         | 20.8                                                              | -0.82                    | 11               |
| SL-NG@Sn foil         | 0.5 M KHCO <sub>3</sub>  | 92                           | 21.3                                                              | -1                       | 12               |
| CuSn NPs              | 0.5 M KHCO <sub>3</sub>  | 53                           | N/A                                                               | -1                       | 13               |
| Cu70Sn30              | 0.5 M KHCO <sub>3</sub>  | 90                           | N/A                                                               | -1.1                     | 14               |
| Ag75/(A-Sn(IV))25     | 0.5 M NaHCO <sub>3</sub> | 75.1                         | 13.4                                                              | -0.9                     | 15               |
| Sn-MOF                | 0.5 M KHCO <sub>3</sub>  | 92                           | 23.2                                                              | -1.2                     | 16               |

**Table S2.**  $R_{ct}$  values of each sample

|            | $R_{ct}$ ( $\Omega$ ) |
|------------|-----------------------|
| Bi film    | 388.2                 |
| Bi-VNS     | 68.74                 |
| BOC@Bi-VNS | 48.09                 |

**Table S3.** Comparison of the performances of reported solar-driven systems using cost-effective PV cells.

| Materials                                        | System type      | Main reaction product         | FE <sub>MAX</sub> of the Product (%) | STF (%) | Stability (h) | Year | Ref.             |
|--------------------------------------------------|------------------|-------------------------------|--------------------------------------|---------|---------------|------|------------------|
| Bi-VNS                                           | PV-EC            | HCOOH                         | 97.2                                 | 11.5    | 13            | 2023 | <b>This work</b> |
| BOI-Bi                                           | PV-PEC           | HCOOH                         | 96.5                                 | 8.3     | 1             | 2021 | 17               |
| Ti cathodes                                      | PV-EC            | HCOOH                         | 80                                   | 7.2     | 5             | 2021 | 18               |
| In/Cu mesh                                       | PV-EC            | HCOOH                         | 67                                   | 1.8     | 1.5           | 2014 | 19               |
| Sn/Cu                                            | PV-EC            | HCOOH                         | 65                                   | 5.7     | N/A           | 2022 | 20               |
| Bi <sub>19</sub> Br <sub>3</sub> S <sub>27</sub> | PV-EC            | HCOOH                         | 98                                   | 4.75    | 3             | 2023 | 7                |
| nano-Ag                                          | PV-EC            | CO                            | 93                                   | 8.05    | 8             | 2020 | 21               |
| Au                                               | PV-EC            | CO                            | ≈90                                  | 7       | 18            | 2015 | 22               |
| np-Ag                                            | PV-EC            | CO                            | 78.1                                 | ≈6.5    | 2             | 2017 | 23               |
| Au/CdTe/ZnTe                                     | PV-PEC           | CO                            | ≈80                                  | 0.43    | 3             | 2016 | 24               |
| GB-Cu                                            | PV-EC            | C <sub>2</sub> H <sub>4</sub> | 38                                   | 3.88    | ~3            | 2020 | 25               |
| Cu-Zn                                            | monolithic PV-EC | Syngas                        | 85                                   | 4.3     | 3             | 2017 | 26               |
| CuAg                                             | PV-EC            | Hydrocarbons & oxygenates     | 30-40                                | 3.8     | 6             | 2017 | 27               |

## REFERENCE

1. Li, N.; Yan, P.; Tang, Y.; Wang, J.; Yu, X.-Y.; Wu, H. Bin. In-Situ Formation of Ligand-Stabilized Bismuth Nanosheets for Efficient CO<sub>2</sub> Conversion. *Appl. Catal. B* **2021**, *297*, 120481.
2. Zhang, X.; Sun, X.; Guo, S.-X.; Bond, A. M.; Zhang, J. Formation of Lattice-Dislocated Bismuth Nanowires on Copper Foam for Enhanced Electrocatalytic CO<sub>2</sub> Reduction at Low Overpotential. *Energy Environ. Sci.* **2019**, *12* (4), 1334–1340.
3. Zhang, W.; Hu, Y.; Ma, L.; Zhu, G.; Zhao, P.; Xue, X.; Chen, R.; Yang, S.; Ma, J.; Liu, J.; Jin, Z. Liquid-Phase Exfoliated Ultrathin Bi Nanosheets: Uncovering the Origins of Enhanced Electrocatalytic CO<sub>2</sub> Reduction on Two-Dimensional Metal Nanostructure. *Nano Energy* **2018**, *53*, 808–816.
4. Zhang, W.; Yang, S.; Jiang, M.; Hu, Y.; Hu, C.; Zhang, X.; Jin, Z. Nanocapillarity and Nanoconfinement Effects of Pipet-like Bismuth@Carbon Nanotubes for Highly Efficient Electrocatalytic CO<sub>2</sub> Reduction. *Nano Lett.* **2021**, *21* (6), 2650–2657.
5. Li, Y.; Chen, J.; Chen, S.; Liao, X.; Zhao, T.; Cheng, F.; Wang, H. In Situ Confined Growth of Bismuth Nanoribbons with Active and Robust Edge Sites for Boosted CO<sub>2</sub> Electroreduction. *ACS Energy Lett.* **2022**, *7* (4), 1454–1461.
6. Xing, Y.; Kong, X.; Guo, X.; Liu, Y.; Li, Q.; Zhang, Y.; Sheng, Y.; Yang, X.; Geng, Z.; Zeng, J. Bi@Sn Core–Shell Structure with Compressive Strain Boosts the Electroreduction of CO<sub>2</sub> into Formic Acid. *Adv. Sci.* **2020**, *7* (22), 1902989.
7. Ma, X.; Wang, Q.; Wang, M.; Jin, X.; Wang, L.; Zhang, L. Bi<sub>19</sub>Br<sub>3</sub>S<sub>27</sub> Nanorods for Formate Production from CO<sub>2</sub> Electroreduction with High Efficiency and Selectivity. *Chem. Eng. J.* **2023**, *474*, 145711.
8. Xu, J.; Yang, S.; Ji, L.; Mao, J.; Zhang, W.; Zheng, X.; Fu, H.; Yuan, M.; Yang, C.; Chen, H.; Li, R. High Current CO<sub>2</sub> Reduction Realized by Edge/Defect-Rich Bismuth Nanosheets. *Nano Res.* **2023**, *16* (1), 53–61.
9. Wu, Z.; Wu, H.; Cai, W.; Wen, Z.; Jia, B.; Wang, L.; Jin, W.; Ma, T. Engineering Bismuth–Tin Interface in Bimetallic Aerogel with a 3D Porous Structure for Highly Selective Electrocatalytic CO<sub>2</sub> Reduction to HCOOH. *Angew. Chem. Int. Ed.* **2021**, *60* (22), 12554–12559.
10. Huang, J.; Guo, X.; Huang, X.; Wang, L. Metal (Sn, Bi, Pb, Cd) in-Situ Anchored on Mesoporous Hollow Kapok-Tubes for Outstanding Electrocatalytic CO<sub>2</sub> Reduction to Formate. *Electrochim. Acta* **2019**, *325*, 134923.
11. Xie, W.; Li, H.; Cui, G.; Li, J.; Song, Y.; Li, S.; Zhang, X.; Lee, J. Y.; Shao, M.; Wei, M. NiSn Atomic Pair on an Integrated Electrode for Synergistic Electrocatalytic CO<sub>2</sub> Reduction. *Angew. Chem. Int. Ed.* **2021**, *60* (13), 7382–7388.
12. Huang, J.; Guo, X.; Wei, Y.; Hu, Q.; Yu, X.; Wang, L. A Renewable, Flexible and Robust Single Layer Nitrogen-Doped Graphene Coating Sn Foil for Boosting Formate Production from Electrocatalytic CO<sub>2</sub> Reduction. *J. CO<sub>2</sub> Util.* **2019**, *33*, 166–170.
13. Xiong, W.; Yang, J.; Shuai, L.; Hou, Y.; Qiu, M.; Li, X.; Leung, M. K. H. CuSn Alloy Nanoparticles on Nitrogen-Doped Graphene for Electrocatalytic CO<sub>2</sub> Reduction. *ChemElectroChem* **2019**, *6* (24), 5951–5957.
14. Ren, W.; Tan, X.; Qu, J.; Li, S.; Li, J.; Liu, X.; Ringer, S. P.; Cairney, J. M.; Wang, K.; Smith, S. C.; Zhao, C. Isolated Copper–Tin Atomic Interfaces Tuning Electrocatalytic CO<sub>2</sub> Conversion. *Nat. Commun.* **2021**, *12* (1), 1449.
15. Zhang, J.; Qiao, M.; Li, Y.; Shao, Q.; Huang, X. Highly Active and Selective Electrocatalytic CO<sub>2</sub> Conversion Enabled by Core/Shell Ag/(Amorphous-Sn(IV)) Nanostructures with Tunable Shell

- Thickness. *ACS Appl. Mater. Interfaces* **2019**, *11* (43), 39722–39727.
16. Wang, X.; Zou, Y.; Zhang, Y.; Marchetti, B.; Liu, Y.; Yi, J.; Zhou, X.-D.; Zhang, J. Tin-Based Metal Organic Framework Catalysts for High-Efficiency Electrocatalytic CO<sub>2</sub> Conversion into Formate. *J. Colloid Interface Sci.* **2022**, *626*, 836–847.
  17. Zhao, J.; Xue, L.; Niu, Z.; Huang, L.; Hou, Y.; Zhang, Z.; Yuan, R.; Ding, Z.; Fu, X.; Lu, X.; Long, J. Conversion of CO<sub>2</sub> to Formic Acid by Integrated All-Solar-Driven Artificial Photosynthetic System. *J. Power Sources* **2021**, *512*, 230532.
  18. Kato, N.; Mizuno, S.; Shiozawa, M.; Nojiri, N.; Kawai, Y.; Fukumoto, K.; Morikawa, T.; Takeda, Y. A Large-Sized Cell for Solar-Driven CO<sub>2</sub> Conversion with a Solar-to-Formate Conversion Efficiency of 7.2%. *Joule* **2021**, *5* (3), 687–705.
  19. White, J. L.; Herb, J. T.; Kaczur, J. J.; Majsztzik, P. W.; Bocarsly, A. B. Photons to Formate: Efficient Electrochemical Solar Energy Conversion via Reduction of Carbon Dioxide. *J. CO<sub>2</sub> Util.* **2014**, *7*, 1–5.
  20. Thijs, B.; Hanssens, L.; Heremans, G.; Wangermez, W.; Rongé, J.; Martens, J. A. Demonstration of a Three Compartment Solar Electrolyser with Gas Phase Cathode Producing Formic Acid from CO<sub>2</sub> and Water Using Earth Abundant Metals. *Front. Chem. Eng.* **2022**.
  21. Chae, S. Y.; Lee, S. Y.; Han, S. G.; Kim, H.; Ko, J.; Park, S.; Joo, O.-S.; Kim, D.; Kang, Y.; Lee, U.; Hwang, Y. J.; Min, B. K. A Perspective on Practical Solar to Carbon Monoxide Production Devices with Economic Evaluation. *Sustain. Energy Fuels* **2020**, *4* (1), 199–212.
  22. Schreier, M.; Curvat, L.; Giordano, F.; Steier, L.; Abate, A.; Zakeeruddin, S. M.; Luo, J.; Mayer, M. T.; Grätzel, M. Efficient Photosynthesis of Carbon Monoxide from CO<sub>2</sub> Using Perovskite Photovoltaics. *Nat. Commun.* **2015**, *6* (1), 7326.
  23. Sriramagiri, G. M.; Ahmed, N.; Luc, W.; Dobson, K. D.; Hegedus, S. S.; Jiao, F. Toward a Practical Solar-Driven CO<sub>2</sub> Flow Cell Electrolyzer: Design and Optimization. *ACS Sustain. Chem. Eng.* **2017**, *5* (11), 10959–10966.
  24. Jang, Y. J.; Jeong, I.; Lee, J.; Lee, J.; Ko, M. J.; Lee, J. S. Unbiased Sunlight-Driven Artificial Photosynthesis of Carbon Monoxide from CO<sub>2</sub> Using a ZnTe-Based Photocathode and a Perovskite Solar Cell in Tandem. *ACS Nano* **2016**, *10* (7), 6980–6987.
  25. Chen, Z.; Wang, T.; Liu, B.; Cheng, D.; Hu, C.; Zhang, G.; Zhu, W.; Wang, H.; Zhao, Z.-J.; Gong, J. Grain-Boundary-Rich Copper for Efficient Solar-Driven Electrochemical CO<sub>2</sub> Reduction to Ethylene and Ethanol. *J. Am. Chem. Soc.* **2020**, *142* (15), 6878–6883.
  26. Urbain, F.; Tang, P.; Carretero, N. M.; Andreu, T.; Gerling, L. G.; Voz, C.; Arbiol, J.; Morante, J. R. A Prototype Reactor for Highly Selective Solar-Driven CO<sub>2</sub> Reduction to Synthesis Gas Using Nanosized Earth-Abundant Catalysts and Silicon Photovoltaics. *Energy Environ. Sci.* **2017**, *10* (10), 2256–2266.
  27. Gurudayal; Bullock, J.; Srankó, D. F.; Towle, C. M.; Lum, Y.; Hettick, M.; Scott, M. C.; Javey, A.; Ager, J. Efficient Solar-Driven Electrochemical CO<sub>2</sub> Reduction to Hydrocarbons and Oxygenates. *Energy Environ. Sci.* **2017**, *10* (10), 2222–2230.
